# Supplementary material for: Vaccine effectiveness for prevention of covid-19 related hospital admission during pregnancy in England during the alpha and delta variant dominant periods of the SARS-CoV-2 pandemic: population based cohort study
Source: PubMed Central journal article supplement (PMC10410807; doi:10.1136/bmjmed-2022-000403), 2023-07-10
Supplement: bmjmed-2022-000403supp001.pdf [file bmjmed-2022-000403supp001.pdf]

## 1 **Supplementary Materials**

### 2 *Method for identifying pregnancy from birth notifications data*

3 The estimated conception date was calculated by subtracting gestational age from  
4 the date of birth on the earliest birth notification occurring after the index date. Two  
5 weeks were added to account for the fact that gestational age is defined from the  
6 start of the last menstrual period, and conception is assumed to occur at the mid-way  
7 point (day 14) of a typically assumed average 28-day menstrual cycle. Women were  
8 classified as pregnant at the index date if there was evidence of SARS-CoV-2  
9 infection between the estimated conception date and date of birth on the birth  
10 notification.

11 Gestational age was missing for 0.3% of the birth notifications used to estimate the  
12 conception date. For these records, gestational age was imputed as 40 weeks for  
13 live births and 32 weeks for stillbirths (the approximate average length of gestation  
14 for these outcomes, calculated from published births data [1]).

### 15 *Method for identifying pregnancy from Hospital Episode Statistics (HES) data*

16 (A) We searched HES data for hospital episodes with evidence of ongoing  
17 pregnancy and end of pregnancy in the 42 weeks before the index date (**Tables S5**  
18 **to S8** report the code lists used). Participants were classified as pregnant at the  
19 index date if they met all of the following criteria:

- 20 • They had at least one hospital episode with an ICD-10 or Classification of  
21 Interventions and Procedures version 4 (OPCS-4) code indicating pregnancy  
22 over the 42 weeks prior to and including the index date.
- 23 • The most recent ICD-10 or OPCS-4 code over the 42 weeks prior to the index  
24 date indicated ongoing pregnancy (not the end of pregnancy).
- 25 • There was no end of pregnancy code in the six weeks prior to the most recent  
26 ongoing pregnancy code (some of the ongoing pregnancy codes relate to  
27 conditions that can be diagnosed in the postpartum period, up to six weeks after  
28 delivery).

29 (B) We also searched HES data for hospital episodes with evidence of ongoing  
30 pregnancy (routine obstetric scans only) and birth events occurring after the index  
31 date. Participants were classified as pregnant at the index date if any of the following  
32 criteria were met:

- 33 • They had a hospital episode with an OPCS-4 code for a dating scan (R36.1;  
34 normally performed at week 12 of pregnancy) up to 70 days after the index date.
- 35 • They had a hospital episode with an OPCS-4 code for a mid-trimester scan  
36 (R36.3; normally performed at week 20 of pregnancy) up to 126 days after the  
37 index date.

- 38 • They had a hospital episode with an ICD-10 code for a live birth (Z37.0, Z37.2,  
39 Z37.5 or Z38) or mixed live and stillbirth (Z37.3 or Z37.6) up to 38 weeks after the  
40 index date.
- 41 • They had a hospital episode with an ICD-10 code for a stillbirth (Z37.1, Z37.4 or  
42 Z37.7) up to 30 weeks after the index date.

### 43 **References**

- 44 [1] Office for National Statistics, Birth characteristics dataset, 2020 edition, 2022.  
45 Available at:  
46 [https://www.ons.gov.uk/peoplepopulationandcommunity/birthsdeathsandmarriages/li](https://www.ons.gov.uk/peoplepopulationandcommunity/birthsdeathsandmarriages/livebirths/datasets/birthcharacteristicsinenglandandwales)  
47 [vebirths/datasets/birthcharacteristicsinenglandandwales](https://www.ons.gov.uk/peoplepopulationandcommunity/birthsdeathsandmarriages/livebirths/datasets/birthcharacteristicsinenglandandwales). [Accessed 1 2 2022].

48 **Table S1.** Coding and source of variables included in the analysis

| Variable                      | Coding                                                                                                                                                       | Source                                                        |
|-------------------------------|--------------------------------------------------------------------------------------------------------------------------------------------------------------|---------------------------------------------------------------|
| Vaccination status            | Unvaccinated (reference group), single-vaccinated, double-vaccinated                                                                                         | NIMS                                                          |
| Pregnancy status              | Pregnant, not pregnant                                                                                                                                       | NHS birth notifications and HES                               |
| Age                           | Restricted cubic spline with an internal knot at the 50 <sup>th</sup> percentile and boundary knots at the 10 <sup>th</sup> and 90 <sup>th</sup> percentiles | 2021 Census and 2011 Census                                   |
| Calendar time of infection    | Restricted cubic spline with an internal knot at the 50 <sup>th</sup> percentile and boundary knots at the 10 <sup>th</sup> and 90 <sup>th</sup> percentiles | NHS Test and Trace and HES                                    |
| Region                        | North East, North West, Yorkshire and the Humber, East Midlands, West Midlands, East of England, London, South East, South West                              | Postcodes from GDPPR and NSPL                                 |
| Rural Urban classification    | Major conurbations, minor conurbations, cities and towns, towns and fringes, villages, hamlets and other isolated dwellings                                  | Postcodes from GDPPR and NSPL                                 |
| Index of Multiple Deprivation | Dummy variables representing deciles of deprivation                                                                                                          | Postcodes from GDPPR and English Indices of Deprivation, 2019 |
| Ethnic group                  | Asian, Black, Mixed, White, Other                                                                                                                            | 2021 and 2011 Census                                          |
| English language proficiency  | Main language, speak English very well or well, do not speak English well or at all                                                                          | 2021 and 2011 Census                                          |
| Country of birth              | UK, non-UK                                                                                                                                                   | 2021 and 2011 Census                                          |
| Keyworker status              | Binary flag                                                                                                                                                  | 2021 and 2011 Census                                          |

|                                          |                                                                                                                                                                                                                                                                                                                                                                                                                                                                                              |                                                                        |
|------------------------------------------|----------------------------------------------------------------------------------------------------------------------------------------------------------------------------------------------------------------------------------------------------------------------------------------------------------------------------------------------------------------------------------------------------------------------------------------------------------------------------------------------|------------------------------------------------------------------------|
| Highest qualification held               | Degree or above, two or more A-levels or equivalent, five or more GCSE passes or equivalent, one to four GCSE passes or equivalent, apprenticeship or other qualification, no qualifications                                                                                                                                                                                                                                                                                                 | 2021 and 2011 Census                                                   |
| Disability status                        | Not disabled, disabled and limited a little, disabled and limited a lot                                                                                                                                                                                                                                                                                                                                                                                                                      | 2021 and 2011 Census                                                   |
| Health status                            | Very good, good, fair, bad, very bad                                                                                                                                                                                                                                                                                                                                                                                                                                                         | 2021 and 2011 Census                                                   |
| Number of pre-existing health conditions | 0, 1, ≥2 (asthma, atrial fibrillation, blood cancer, chronic kidney disease, congenital heart problem, chronic obstructive pulmonary disease, congestive cardiac failure, coronary heart disease, cystic fibrosis, epilepsy, learning disability, liver cirrhosis, peripheral vascular disease, pulmonary hypertension or fibrosis, respiratory cancer, rheumatoid arthritis or systemic lupus erythematosus, stroke, severe mental illness, sickle cell disease, type 1 or type 2 diabetes) | GDPPR (8 <sup>th</sup> December 2000 to 8 <sup>th</sup> December 2020) |

49 GDPPR, General Practice Extraction Service Data for Pandemic Planning and Research; HES, Hospital Episode Statistics; NSPL,  
50 National Statistics Postcode Lookup; NIMS, National Immunisation Management Service

51 **Table S2.** Hazard ratios for COVID-19 hospital admission within 28 days of SARS-  
52 CoV-2 infection

| <b>Pregnancy status</b> | <b>Vaccination status</b> | <b>Hazard ratio<sup>1</sup> (95% CI)</b> |
|-------------------------|---------------------------|------------------------------------------|
| Not pregnant            | Single-vaccinated         | 0.21 (0.19 to 0.23)                      |
|                         | Double-vaccinated         | 0.16 (0.15 to 0.18)                      |
| Pregnant                | Single-vaccinated         | 0.24 (0.18 to 0.31)                      |
|                         | Double-vaccinated         | 0.17 (0.12 to 0.25)                      |

53 <sup>1</sup>Results obtained from Cox proportional hazards models adjusted for age, calendar  
54 time of infection, region, Index of Multiple deprivation decile group, Rural/Urban  
55 classification, ethnic group, English language proficiency, country of birth, keyworker  
56 status, highest qualification held, disability status, self-reported health status, and  
57 number of pre-existing conditions.

58 **Table S3.** Odds ratios for COVID-19 hospital admission within 120 days of SARS-  
59 CoV-2 infection

| <b>Pregnancy status</b> | <b>Vaccination status</b> | <b>Odds ratio<sup>1</sup> (95% CI)</b> |
|-------------------------|---------------------------|----------------------------------------|
| Not pregnant            | Single-vaccinated         | 0.21 (0.19 to 0.23)                    |
|                         | Double-vaccinated         | 0.16 (0.14 to 0.18)                    |
| Pregnant                | Single-vaccinated         | 0.22 (0.17 to 0.29)                    |
|                         | Double-vaccinated         | 0.15 (0.10 to 0.23)                    |

60 <sup>1</sup>Results obtained from binary logistic regression models adjusted for age, calendar  
61 time of infection, region, Index of Multiple deprivation decile group, Rural/Urban  
62 classification, ethnic group, English language proficiency, country of birth, keyworker  
63 status, highest qualification held, disability status, self-reported health status, and  
64 number of pre-existing conditions.

65 **Table S4.** Hazard ratios for COVID-19 hospital admission in pregnant women from  
66 sensitivity analysis excluding those who were potentially misclassified as pregnant

| <b>Vaccination status</b> | <b>Number of pregnant women</b> | <b>Hazard ratio<sup>1</sup> (95% CI)</b> |
|---------------------------|---------------------------------|------------------------------------------|
| Unvaccinated              | 27,629                          | Ref                                      |
| Single-vaccinated         | 2,681                           | 0.24 (0.18 to 0.31)                      |
| Double-vaccinated         | 1,568                           | 0.17 (0.11 to 0.24)                      |

67 <sup>1</sup>Results obtained from Cox proportional hazards models adjusted for age, calendar  
68 time of infection, region, Index of Multiple deprivation decile group, Rural/Urban  
69 classification, ethnic group, English language proficiency, country of birth, keyworker  
70 status, highest qualification held, disability status, self-reported health status, and  
71 number of pre-existing conditions.

72 **Table S5.** ICD-10 code list for ongoing pregnancy

| <b>Code</b> | <b>Description</b>                                                                                                          |
|-------------|-----------------------------------------------------------------------------------------------------------------------------|
| O07%        | Failed attempted abortion                                                                                                   |
| O10%        | Pre-existing hypertension complicating pregnancy, childbirth and the puerperium                                             |
| O11%        | Pre-eclampsia superimposed on chronic hypertension                                                                          |
| O12%        | Gestational oedema and proteinuria without hypertension                                                                     |
| O13%        | Gestational hypertension                                                                                                    |
| O14%        | Pre-eclampsia                                                                                                               |
| O15%        | Eclampsia                                                                                                                   |
| O16%        | Unspecified maternal hypertension                                                                                           |
| O20%        | Haemorrhage in early pregnancy                                                                                              |
| O21%        | Excessive vomiting in pregnancy                                                                                             |
| O22%        | Venous complications and haemorrhoids in pregnancy                                                                          |
| O23%        | Infections of genitourinary tract in pregnancy                                                                              |
| O24%        | Diabetes mellitus in pregnancy                                                                                              |
| O25%        | Malnutrition in pregnancy                                                                                                   |
| O26%        | Maternal care for other conditions predominantly related to pregnancy                                                       |
| O28%        | Abnormal findings on antenatal screening of mother                                                                          |
| O29%        | Complications of anaesthesia during pregnancy                                                                               |
| O30%        | Multiple gestation                                                                                                          |
| O31%        | Complications specific to multiple gestation                                                                                |
| O32%        | Maternal care for known or suspected malpresentation of fetus                                                               |
| O33%        | Maternal care for known or suspected disproportion                                                                          |
| O34%        | Maternal care for known or suspected abnormality of pelvic organs                                                           |
| O35%        | Maternal care for known or suspected fetal abnormality and damage                                                           |
| O36%        | Maternal care for other known or suspected fetal problems                                                                   |
| O40%        | Polyhydramnios                                                                                                              |
| O41%        | Other disorders of amniotic fluid and membranes                                                                             |
| O42%        | Premature rupture of membranes                                                                                              |
| O43%        | Placental disorders                                                                                                         |
| O44%        | Placenta praevia                                                                                                            |
| O45%        | Premature separation of placenta [abruptio placentae]                                                                       |
| O46%        | Antepartum haemorrhage, not elsewhere classified                                                                            |
| O47%        | False labour                                                                                                                |
| O48%        | Prolonged pregnancy                                                                                                         |
| O88%        | Obstetric embolism                                                                                                          |
| O98%        | Maternal infectious and parasitic diseases classifiable elsewhere but complicating pregnancy, childbirth and the puerperium |
| O99%        | Other maternal diseases classifiable elsewhere but complicating pregnancy, childbirth and the puerperium                    |
| Z321        | Pregnancy confirmed                                                                                                         |
| Z33%        | Pregnant state, incidental                                                                                                  |
| Z34%        | Supervision of normal pregnancy                                                                                             |
| Z35%        | Supervision of high-risk pregnancy                                                                                          |
| Z36%        | Antenatal screening                                                                                                         |

73



74 **Table S6.** OPCS-4 code list for ongoing pregnancy

| <b>Code</b> | <b>Description</b>                                                        |
|-------------|---------------------------------------------------------------------------|
| R01%        | Therapeutic endoscopic operations on fetus                                |
| R02%        | Diagnostic endoscopic examination of fetus                                |
| R04%        | Therapeutic percutaneous operations on fetus                              |
| R05%        | Diagnostic percutaneous examination of fetus                              |
| R061        | Selective feticide NEC                                                    |
| R063        | Percutaneous selective feticide by vascular occlusion of umbilical cord   |
| R07%        | Therapeutic endoscopic operations for twin to twin transfusion syndrome   |
| R08%        | Therapeutic percutaneous operations for twin to twin transfusion syndrome |
| R09%        | Open operations on fetus                                                  |
| R10%        | Other operations on amniotic cavity                                       |
| R11%        | Other therapeutic percutaneous operations on fetus                        |
| R12%        | Operations on gravid uterus                                               |
| R13%        | Other operations on fetus                                                 |
| R36%        | Routine obstetric scan                                                    |
| R37%        | Non-routine obstetric scan for fetal observations                         |
| R38%        | Other non-routine obstetric scan                                          |
| R40%        | Other maternal physiological assessments                                  |
| R42%        | Obstetric Doppler ultrasound                                              |
| R43%        | Ultrasound monitoring                                                     |

75

76 **Table S7.** ICD-10 code list for the end of pregnancy outcomes

| <b>Code</b> | <b>Description</b>                                                                   |
|-------------|--------------------------------------------------------------------------------------|
| O00%        | Ectopic pregnancy                                                                    |
| O01%        | Hydatidiform mole                                                                    |
| O02%        | Other abnormal products of conception                                                |
| O03%        | Spontaneous abortion                                                                 |
| O04%        | Medical abortion                                                                     |
| O05%        | Other abortion                                                                       |
| O06%        | Unspecified abortion                                                                 |
| O08%        | Complications following abortion and ectopic and molar pregnancy                     |
| O60%        | Preterm labour and delivery                                                          |
| O61%        | Failed induction of labour                                                           |
| O62%        | Abnormalities of forces of labour                                                    |
| O63%        | Long labour                                                                          |
| O64%        | Obstructed labour due to malposition and malpresentation of fetus                    |
| O65%        | Obstructed labour due to maternal pelvic abnormality                                 |
| O66%        | Other obstructed labour                                                              |
| O67%        | Labour and delivery complicated by intrapartum haemorrhage, not elsewhere classified |
| O68%        | Labour and delivery complicated by fetal stress [distress]                           |
| O69%        | Labour and delivery complicated by umbilical cord complications                      |
| O70%        | Perineal laceration during delivery                                                  |
| O71%        | Other obstetric trauma                                                               |
| O72%        | Postpartum haemorrhage                                                               |
| O73%        | Retained placenta and membranes, without haemorrhage                                 |
| O74%        | Complications of anaesthesia during labour and delivery                              |
| O75%        | Other complications of labour and delivery, not elsewhere classified                 |
| O80%        | Single spontaneous delivery                                                          |
| O81%        | Single delivery by forceps and vacuum extractor                                      |
| O82%        | Single delivery by caesarean section                                                 |
| O83%        | Other assisted single delivery                                                       |
| O84%        | Multiple delivery                                                                    |
| O85%        | Puerperal sepsis                                                                     |
| O86%        | Other puerperal infections                                                           |
| O87%        | Venous complications and haemorrhoids in the puerperium                              |
| O89%        | Complications of anaesthesia during the puerperium                                   |
| O90%        | Complications of the puerperium, not elsewhere classified                            |
| Z37%        | Outcome of delivery                                                                  |
| Z38%        | Liveborn infants according to place of birth and type of delivery                    |

77

78 **Table S8.** OPCS-4 code list for the end of pregnancy outcomes

| <b>Code</b> | <b>Description</b>                                                                          |
|-------------|---------------------------------------------------------------------------------------------|
| Q091        | Open removal of products of conception from uterus                                          |
| Q101        | Dilation of cervix uteri and curettage of products of conception from uterus                |
| Q102        | Curettage of products of conception from uterus NEC                                         |
| Q111        | Vacuum aspiration of products of conception from uterus NEC                                 |
| Q112        | Dilation of cervix uteri and evacuation of products of conception from uterus NEC           |
| Q113        | Evacuation of products of conception from uterus NEC                                        |
| Q114        | Extraction of menses                                                                        |
| Q115        | Vacuum aspiration of products of conception from uterus using rigid cannula                 |
| Q116        | Vacuum aspiration of products of conception from uterus using flexible cannula              |
| Q311        | Removal of products of conception from fallopian tube                                       |
| Q58%        | Delivery of terminated fetus                                                                |
| R062        | Feticide NEC                                                                                |
| R14%        | Surgical induction of labour                                                                |
| R15%        | Other induction of labour                                                                   |
| R17%        | Elective caesarean delivery                                                                 |
| R18%        | Other caesarean delivery                                                                    |
| R19%        | Breech extraction delivery                                                                  |
| R20%        | Other breech delivery                                                                       |
| R21%        | Forceps cephalic delivery                                                                   |
| R22%        | Vacuum delivery                                                                             |
| R23%        | Cephalic vaginal delivery with abnormal presentation of head at delivery without instrument |
| R24%        | Normal delivery                                                                             |
| R25%        | Other methods of delivery                                                                   |
| R27%        | Other operations to facilitate delivery                                                     |
| R28%        | Instrumental removal of products of conception from delivered uterus                        |
| R29%        | Manual removal of products of conception from delivered uterus                              |
| R30%        | Other operations on delivered uterus                                                        |
| R32%        | Repair of obstetric laceration                                                              |

79

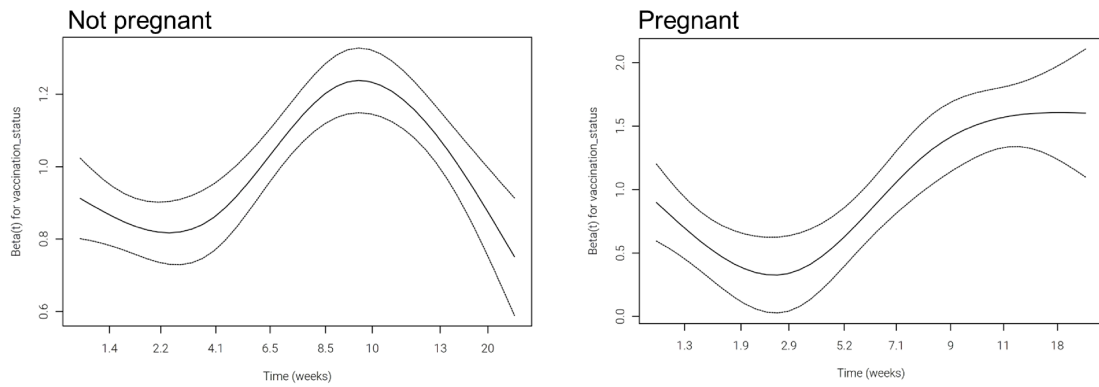

80

81 **Figure S1.** Schoenfeld residual plots for vaccination coefficient in non-pregnant (left)  
82 and pregnant (right) women.
